# Supplementary material
Source: ML conference proceedings conference paper supplement (https://proceedings.mlr.press/v161/kleinberg21a.html)
Supplement: Supplementary file [file kleinberg21a-supp.pdf]

---

## Stochastic Model for Sunk Cost Bias - Supplementary material

---

Jon Kleinberg<sup>1</sup>

Sigal Oren<sup>2</sup>

Manish Raghavan<sup>1</sup>

Nadav Sklar<sup>2</sup>

<sup>1</sup>Computer Science Dept., Cornell University, Ithaca, New York, USA

<sup>2</sup>Computer Science Dept., Ben-Gurion University of the Negev, Be'er Sheva, Israel

### A MISSING PROOFS FROM SECTION 4

**Claim A.1** *The function  $\prod_{i=1}^{n-1} (1 - p_i) \cdot (\sum_{i=1}^{n-1} p_i)$  attains its maximal value for  $0 \leq p_i \leq 1$ , when for every  $i$ ,  $p_i = 1/n$ .*

**Proof:** We simply take partial derivatives and compare them to 0. To this end, it will be more convenient to use  $q_i = 1 - p_i$  and take partial derivatives of the function

$$f(q_1, \dots, q_n) = \prod_{i=1}^{n-1} q_i \cdot (n - 1 - \sum_{i=1}^{n-1} q_i).$$

Observe that:

$$\frac{\partial f}{\partial q_i} = \prod_{j \neq i} q_j (n - 1 - \sum_{j \neq i} q_j) - 2 \cdot \prod_j q_j$$

By comparing it to 0 and some rearranging we get that:

$$\begin{aligned} 2 \cdot \prod_j q_j &= \prod_{j \neq i} q_j (n - 1 - \sum_{j \neq i} q_j) \\ \implies 2q_i &= n - 1 - \sum_{j \neq i} q_j \\ \implies q_i &= n - 1 - \sum_j q_j \end{aligned}$$

Thus, we have that for every  $i$ ,  $q_i$  has the same value of  $q_i = n - 1 - \sum_j q_j$  and to compute the value of  $q_i$  we can solve:  $q = n - 1 - (n - 1)q$  which implies that  $q = \frac{n-1}{n}$ . Thus, we have that in our original maximization problem, for every  $i$ ,  $p_i = 1/n$ .  $\square$

**Lemma A.2** *For any  $n \geq 3$  the value of  $\lambda$  in Theorem 4.4 is smaller than 1.*

**Proof:** Recall that  $\lambda = \frac{\pi_o}{(1-p)^{n-1}(n-1)c}$  where  $\pi_o = \frac{1-(1-p)^{n-1}}{p}(p-c)$ ,  $p = \frac{1}{n}$  and  $c = \frac{1}{n} - \frac{1}{n^2}$ . By plugging in the values of  $p$ ,  $c$  and  $\pi_o$  we get that

$$\lambda = \frac{(1 - (1 - \frac{1}{n})^{n-1})}{n(1 - \frac{1}{n})^{n+1}}$$

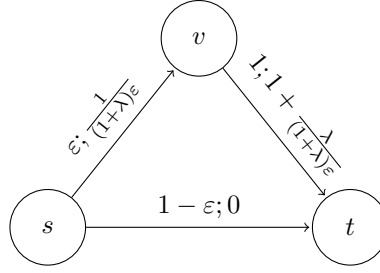

Figure 1: On each edge the left expression is the probability of taking the edge and the right number is the cost if the edge is taken. For  $R = 1$ , we have that  $\pi_s = 0$  and  $\pi_o = \frac{\lambda}{1+\lambda} \cdot R - \varepsilon$ .

To show that  $\lambda \leq 1$  it suffices to show that:

$$\left(1 - \frac{1}{n}\right)^{n-1} + n\left(1 - \frac{1}{n}\right)^{n+1} \geq 1$$

Let  $f(n) = \left(1 - \frac{1}{n}\right)^{n-1} + n\left(1 - \frac{1}{n}\right)^{n+1}$ . Observe that  $f(3) = 28/27 > 1$ . Thus, showing that  $f(n)$  is increasing will complete the proof. Note that

$$f'(n) = \frac{\left(\frac{n-1}{n}\right)^n \left((n^2 - n + 1) \ln\left(\frac{n-1}{n}\right) + 2n - 1\right)}{n-1}$$

and by using calculus one can show that it is indeed the case that  $f'(n) > 0$  for any  $n > 2$  which completes the proof.  $\square$

## B THREE NODE INSTANCES

**Claim B.1** *In an alternative model in which costs are positioned on the the edges. For any  $\varepsilon$  there exists a 3-node graph in which  $\pi_s = 0$  and  $\pi_o = \frac{\lambda}{1+\lambda} \cdot R - \varepsilon$ .*

**Proof:** Consider the 3-node graph depicted in Figure 1. In this graph, it is clear that the optimal agent will not continue from  $v$  to  $t$  but the sophisticated agent will. Thus, the expected payoff of the optimal agent is:

$$\pi_o = (1 - \varepsilon) \cdot 1 - \varepsilon \cdot \frac{1}{(1 + \lambda)\varepsilon} = \frac{\lambda}{1 + \lambda} - \varepsilon$$

If a  $\lambda$  biased sophisticated agent will choose to traverse the graph he will always reach the target. Thus, its expected payoff will be:

$$1 - \varepsilon \left( \frac{1}{(1 + \lambda)\varepsilon} + \frac{\lambda}{(1 + \lambda)\varepsilon} \right) = 0$$

Thus, the payoff of the sophisticated agent is 0.  $\square$

**Claim B.2** *For any 3-node graph and any  $\lambda \geq 0$ ,  $\pi_s \geq \pi_o - \frac{2+\lambda-2\sqrt{1+\lambda}}{\lambda} \cdot R$  and this is tight.*

**Proof:** Consider the graph in figure 2. First, one can observe that the only two possible scenarios in which the optimal and the sophisticated agent will have different payoffs are:

- The optimal agent traverses the graph for a single step and the sophisticated agent continues.
- The optimal agent traverses the graph for a single step and the sophisticated agent is unwilling to start.

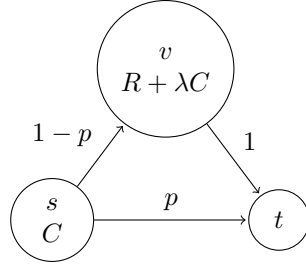

Figure 2: 3-node graph illustration for Claim B.2.

These are the only scenarios we should consider as if the optimal agent does not traverse the graph or continues at  $v$  then the sophisticated agent will do the same.

We begin by considering the scenario in which the optimal agent traverses the graph for a single step and the sophisticated agent continues. Observe that  $\pi_o = pR - C$ . Notice that if the sophisticated agent would start traversing the graph it would continue at  $v$ . Thus, its expected payoff for traversing the graph is  $pR - C - (1 - p)\lambda C \leq 0$ . By rearranging we get that  $p \leq \frac{C(1+\lambda)}{R+\lambda C}$ . Thus, to maximize the expected payoff of the optimal agent, we set  $p = \frac{C(1+\lambda)}{R+\lambda C}$  and get that:

$$\pi_o = \frac{C(1+\lambda)}{R+\lambda C} \cdot R - C$$

To maximize  $\pi_o$  we take a derivative with respect to  $C$  and compare it to 0:

$$\frac{\partial \pi_o}{\partial C} = \frac{R(1+\lambda)(R+\lambda C) - \lambda C R(1+\lambda)}{(R+\lambda C)^2} - 1 = \frac{R^2(1+\lambda)}{(R+\lambda C)^2} - 1$$

$$\frac{R^2(1+\lambda)}{(R+\lambda C)^2} - 1 = 0 \implies R^2(1+\lambda) = (R+\lambda C)^2$$

$$C = \frac{R}{\lambda} (\sqrt{1+\lambda} - 1)$$

which gives

$$\begin{aligned} p &= \frac{R(\sqrt{1+\lambda} - 1)(1+\lambda)}{\lambda(R + R(\sqrt{1+\lambda} - 1))} = \frac{(\sqrt{1+\lambda} - 1)\sqrt{1+\lambda}}{\lambda} \\ &= \frac{1 + \lambda - \sqrt{1+\lambda}}{\lambda} \end{aligned}$$

Therefore:

$$\begin{aligned} \pi_o &= \frac{1 + \lambda - \sqrt{1+\lambda}}{\lambda} \cdot R - \frac{R}{\lambda} (\sqrt{1+\lambda} - 1) \\ &= \frac{(2 + \lambda - 2\sqrt{1+\lambda})}{\lambda} \cdot R \end{aligned}$$

For  $0 < \lambda \leq 1$  we get that  $0 < \pi_o - \pi_s \leq 0.172R$ .

Finally, we consider the scenario in which the sophisticated agent traverse the graph and continues at  $v$  while the optimal agent stops traversing the graph at  $v$ . We show that optimizing the payoff difference for this scenario get us to the same optimization problem as we just solved. Denote by  $c(v)$  the cost at  $v$ . Since the sophisticated agent continues we have that  $R - c(v) \geq -\lambda C \implies c(v) \leq R + \lambda C$ . Also, since the expected payoff of the sophisticated agent is positive we have that:

$$\begin{aligned} \pi_s &= pR - C + (1 - p)(R - c(v)) > 0 \implies \\ R + pc(v) - c(v) - C &> 0 \implies \\ c(v) &< \frac{R - C}{1 - p} \end{aligned}$$

Consider the difference between the payoffs of the agents:

$$\pi_o - \pi_s = -(1-p)(R - c(v)) = (1-p)(c(v) - R)$$

Clearly, the difference is maximized for the maximal value of  $c(v)$ . Since  $c(v) \leq \min\{\frac{R-C}{1-p}, R + \lambda C\}$  we get that this value is maximized when  $\frac{R-C}{1-p} = R + \lambda C$  by rearranging we get that in this case  $p = \frac{C(1+\lambda)}{R+\lambda C}$ . Since in this case we have that:

$$\pi_o - \pi_s \leq (1-p)(\min\{\frac{R-C}{1-p}, R + \lambda C\} - R) = p \cdot R - C$$

This implies the exact optimization problem as in the first case, which completes the proof. □
